# Supplementary material for: Religiosity as a potential mediator for violence in childhood and adulthood: results from a Brazilian nationally representative survey
Source: HighWire-hosted journal article supplement (doi:10.1136/bmjopen-2021-051225), 2022-06-01
Supplement: bmjopen-2021-051225supp001_data_supplement.pdf [file bmjopen-2021-051225supp001_data_supplement.pdf]

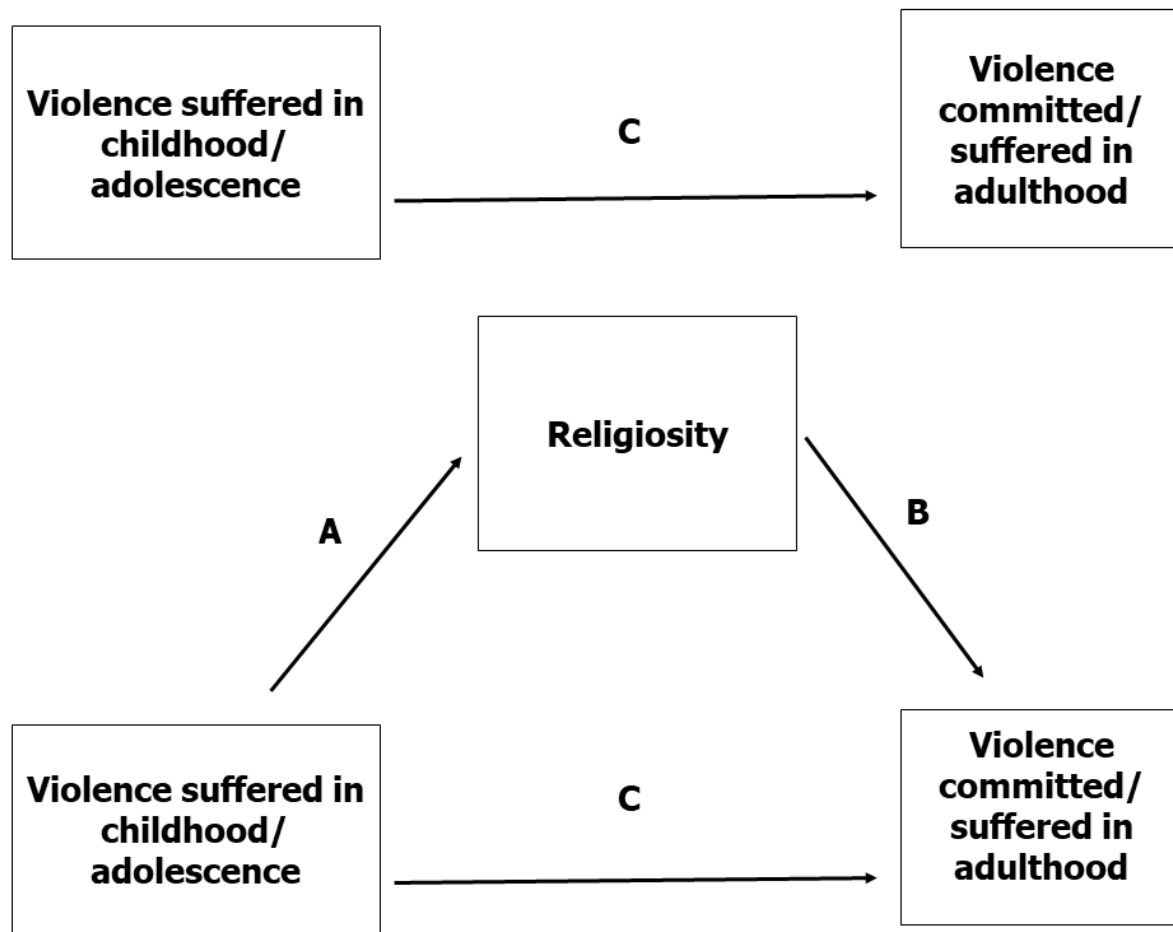

**Figure 1. Mediation role model of religiosity on childhood violence and violence in adulthood**
